1 **Title: Potent in vitro Neutralization of SARS-CoV-2 by Hetero-bivalent Alpaca Nanobodies**  
2 **Targeting the Spike Receptor-Binding Domain**

3 Huan Ma<sup>1,2#</sup>, Weihong Zeng<sup>2#</sup>, Xiangzhi Meng<sup>3</sup>, Xiaoxue Huang<sup>2</sup>, Yunru Yang<sup>2</sup>, Dan Zhao<sup>2</sup>, Peigen  
4 Zhou<sup>4</sup>, Xiaofang Wang<sup>5</sup>, Changcheng Zhao<sup>6</sup>, Yong Sun<sup>7</sup>, Peihui Wang<sup>8</sup>, Huichao Ou<sup>2</sup>, Xiaowen Hu<sup>1</sup>, Yan  
5 Xiang<sup>3\*</sup>, Tengchuan Jin<sup>1,2,9\*</sup>.

6

7 **Running title:** Identification of SARS-CoV-2 RBD-specific nanobodies.

8

9 <sup>1</sup> Department of pulmonary and critical care medicine, The First Affiliated Hospital of USTC, Division  
10 of Life Sciences and Medicine, University of Science and Technology of China, Hefei, Anhui 230001,  
11 China

12 <sup>2</sup>Hefei National Laboratory for Physical Sciences at Microscale, Laboratory of Structural Immunology,  
13 CAS Key Laboratory of Innate Immunity and Chronic Disease, Division of Life Sciences and Medicine,  
14 University of Science and Technology of China, Hefei, Anhui 230027, China

15 <sup>3</sup> Department of Microbiology, Immunology and Molecular Genetics, University of Texas Health  
16 Science Center at San Antonio, San Antonio, Texas, USA

17 <sup>4</sup> Department of Statistics, University of Wisconsin-Madison, Madison, WI 53706, USA

18 <sup>5</sup> The First Affiliated Hospital of USTC, Division of Life Sciences and Medicine, University of Science  
19 and Technology of China, Hefei, Anhui 230001, China

20 <sup>6</sup> Department of Infectious Diseases, The First Affiliated Hospital of USTC, Division of Life Sciences  
21 and Medicine, University of Science and Technology of China, Hefei, Anhui 230001, China

22 <sup>7</sup> Anhui Provincial Center for Disease Control and Prevention, Hefei, Anhui 230001, China

23 <sup>8</sup> Key Laboratory for Experimental Teratology of Ministry of Education and Advanced Medical Research  
24 Institute, Cheeloo College of Medicine, Shandong University, 250012, Jinan, China.

25 <sup>9</sup> CAS Center for Excellence in Molecular Cell Science, Chinese Academy of Science, Shanghai 200031,  
26 China

27

28 \*To whom correspondence should be addressed:

29 Prof. Tengchuan Jin: Division of Life Sciences and Medicine, University of Science and Technology of  
30 China, Hefei, 230027, China; Email: jint@ustc.edu.cn; Tel: +86-551-63600720;

31 Prof. Yan Xiang: Department of Microbiology, Immunology and Molecular Genetics, University of  
32 Texas Health Science Center at San Antonio, San Antonio, Texas, USA; Email: xiangy@uthscsa.edu;

33 #These authors contributed equally to this work.

34

35 **Abstract**

36 Cell entry by SARS-CoV-2 requires the binding between the receptor-binding domain (RBD) of the viral  
37 Spike protein and the cellular angiotensin-converting enzyme 2 (ACE2). As such, RBD has become the  
38 major target for vaccine development, while RBD-specific antibodies are pursued as therapeutics. Here,  
39 we report the development and characterization of SARS-CoV-2 RBD-specific V<sub>H</sub>H/nanobody (Nb)  
40 from immunized alpacas. Seven RBD-specific Nbs with high stability were identified using phage  
41 display. They bind to SARS-CoV-2 RBD with affinity K<sub>D</sub> ranging from 2.6 to 113 nM, and six of them  
42 can block RBD-ACE2 interaction. The fusion of the Nbs with IgG1 Fc resulted in homodimers with  
43 greatly improved RBD-binding affinities (K<sub>D</sub> ranging from 72.7 pM to 4.5 nM) and nanomolar RBD-  
44 ACE2 blocking abilities. Furthermore, fusion of two Nbs with non-overlapping epitopes resulted in  
45 hetero-bivalent Nbs, namely aRBD-2-5 and aRBD-2-7, with significantly higher RBD binding affinities  
46 (K<sub>D</sub> of 59.2 pM and 0.25 nM) and greatly enhanced SARS-CoV-2 neutralizing potency. The 50%  
47 neutralization dose (ND<sub>50</sub>) of aRBD-2-5 and aRBD-2-7 was 1.22 ng/mL (~0.043 nM) and 3.18 ng/mL  
48 (~0.111 nM), respectively. These high-affinity SARS-CoV-2 blocking Nbs could be further developed  
49 into therapeutics as well as diagnosis reagents for COVID-19.

50 **Importance**

51 To date, SARS-CoV-2 has caused tremendous loss of human life and economic output worldwide.  
52 Although a few COVID-19 vaccines have been approved in several countries, the development of  
53 effective therapeutics including SARS-CoV-2 targeting antibodies remains critical. Due to their small  
54 size (13-15 kDa), highly solubility and stability, Nbs are particularly well suited for pulmonary delivery  
55 and more amenable to engineer into multi-valent formats, compared to the conventional antibody. Here,  
56 we report a serial of new anti-SARS-CoV-2 Nbs isolated from immunized alpaca and two engineered  
57 hetero-bivalent Nbs. These potent neutralizing Nbs showed promise as potential therapeutics against  
58 COVID-19.

59 **Keywords:** SARS-CoV-2; COVID-19; Nanobody; Antibody; Alpaca; Hetero-bivalent.

60 **Introduction**

61 Coronavirus disease 2019 (COVID-19) caused by SARS-CoV-2 has resulted in tremendous health and  
62 economic losses worldwide. SARS-CoV-2 belongs to the betacoronavirus genus, which include two  
63 other significant human pathogens, the Severe Acute Respiratory Syndrome (SARS-CoV-1) virus and  
64 the Middle East Respiratory Syndrome (MERS) virus, first emerging in humans in 2002 and 2012,  
65 respectively [1-4]. Currently, several COVID-19 vaccines have been approved for emergency usages by  
66 several countries [5, 6]. Remdesivir [7] and dexamethasone [8] have also been approved for treating  
67 COVID-19 under emergency use authorization. To more effectively combat COVID-19 and prepare for  
68 possible future pandemics, it remains essential to develop new effective drugs targeting coronaviruses.

69 Virus-specific antibody responses can be readily detected in sera of COVID-19 patients [9-12], and a  
70 series of monoclonal antibodies (mAbs) that neutralize SARS-CoV-2 have been isolated from infected  
71 individuals [13-18]. Both convalescent plasma and mAbs targeting SARS-CoV-2 have shown promise  
72 as therapeutics for treating COVID-19 patients [19-21]. In addition to the conventional mAbs, a distinct  
73 type of antibody fragment derived from camelid immunoglobulins, termed V<sub>H</sub>H or nanobody (Nb), is an  
74 attractive alternative for COVID-19 treatment. Compared to the conventional antibody, V<sub>H</sub>H is cheaper  
75 to produce, has an enhanced tissue penetration, and is more amenable to engineering into multivalent  
76 and multi-specific antigen-binding formats [22]. Moreover, Nbs are particularly well suited for  
77 pulmonary delivery because of their small size (13-15 kDa), highly solubility and stability [23, 24].

78 Cell entry by SARS-CoV-2 requires the interaction between the RBD of the viral Spike protein and  
79 the receptor ACE2, which is also the receptor for SARS-CoV-1[25-29]. The RBD of SARS-CoV-2 binds  
80 to ACE2 with a  $K_D$  of ~15 nM, which about 10- to 20-fold better than that for SARS-CoV-1 RBD[30].

81 In this study, we report the development and characterization of seven anti-RBD Nbs isolated from  
82 alpccas immunized with SARS-CoV-2 RBD. Furthermore, two high-affinity hetero-bivalent Nbs were  
83 developed by fusing two Nbs with distinct epitopes, resulting in antibodies with strong SARS-CoV-2  
84 neutralizing potency.

85  
86

## 87 **Results**

### 88 **Isolation of anti-SARS-CoV-2 RBD nanobodies from immunized alpacas**

89 Our aim was to develop potent SARS-CoV-2 neutralizing antibodies with favorable biological  
90 characteristics. Towards this goal, we immunized two alpacas 3 times with highly purified recombinant  
91 SARS-CoV-2 RBD (**Fig. S1**). Total RNA was extracted from  $1 \times 10^7$  PBMCs from the immunized alpacas  
92 and used as the template for synthesizing cDNA. The  $V_{HH}$  coding regions were amplified from the cDNA  
93 and cloned into a phagemid vector, generating a library with about  $1.6 \times 10^7$  independent clones. Phages  
94 displaying  $V_{HH}$  were prepared from the library with the helper phage and selected with SARS-CoV-2  
95 RBD via two rounds of biopanning. Titration of the output phages after each round of panning indicated  
96 that the RBD-binding phages were effectively enriched (**Fig. 1A**).

97 After each round of panning, thirty-one individual phages were randomly picked and their RBD-  
98 binding activity evaluated with phage ELISA. Nineteen and thirty phages were found to be positive for  
99 RBD binding after the first and second round of panning, respectively (**Fig. 1B**). Sequencing of the  
100 positive phage clones after two rounds of panning revealed seven unique Nbs (**Fig. 1C**), which were  
101 named as aRBD-2, aRBD-3, aRBD-5, aRBD-7, aRBD-41, aRBD-42 and aRBD-54. All seven phages  
102 can bind to the S1 domain of SARS-CoV-2 in ELISA, and one (aRBD-41) can also bind to SARS-CoV-  
103 1 RBD (**Fig. S2**).

104

### 105 **Binding characteristics of the identified nanobodies**

106 The identified Nbs were expressed with a mammalian expression vector in 293F cells. To configure the  
107 Nb into IgG-like molecule, we fused the C-terminus of the identified Nbs to a TEV protease cleavage  
108 site and a human IgG1 Fc in a mammalian expression vector. The homo-bivalent Nb-TEV-Fc fusions  
109 were purified from the culture supernatant using protein A (**Fig. S3A**). All of the Nb-TEV-Fc fusions  
110 showed more than 100 mg/L yield after three days of expression (data not shown). To prepare Nb  
111 monomers without the Fc, the fusion proteins were digested with the TEV enzyme (6His tagged) and  
112 passed through protein G and Ni NTA column. Highly purified Nbs were obtained from the flow-through  
113 (**Fig. S3B**). The conformational stability of the seven Nbs were tested using circular dichroism, and the  
114 results showed that they were highly stable in solution, with the melting temperature exceeding 70 °C  
115 (**Fig. S4**).

116 The SARS-CoV-2 RBD-binding abilities of the seven Nbs were first verified using size-exclusion  
117 chromatography (SEC). All seven Nbs formed stable complexes with RBD in solution (**Fig. 2A-I**).  
118 Furthermore, most Nb-Fc fusions demonstrated strong binding to both RBD and the entire ectodomain  
119 (S1+S2) of SARS-CoV-2 spike in ELISA, with  $EC_{50}$  of low nM. Compared to the human ACE2-Fc  
120 recombinant protein, they bind to the RBD with a higher affinity (**Fig. 2J**), while all but aRBD-42 bind  
121 to the entire ectodomain of spike protein with a higher affinity (**Fig. 2K**). In addition, we also tested the  
122 binding ability between the 7 Nbs and a RBD variant that contains N501Y point mutation derived from  
123 a recent new SARS-CoV-2 lineage that was rapidly spreading in UK [31]. As expected, N501Y variant  
124 showed an enhanced binding activity with ACE2-Fc than original RBD. Interestingly, all of the 7 Nbs  
125 exhibited similar binding activity to the variant and original RBD (**Fig. S5**).

126 The binding affinity of the Nbs to RBD were also measured using Surface Plasmon Resonance (SPR).  
127 Six Nbs showed a high binding affinity, with  $K_D$  values of 2.60, 3.33, 16.3, 3.31, 21.9 and 5.49 nM for  
128 aRBD-2, aRBD-3, aRBD-5, aRBD-7, aRBD-41 and aRBD-54, respectively (**Fig. 3A-E and G**).  
129 Consistent with ELISA, aRBD-42 had a relatively weak binding affinity with a  $K_D$  of 113 nM (**Fig. 3F**).  
130 The affinities of Nb-Fc fusions were also measured by SPR. Probably due to dimerization, they showed

131 an enhanced binding capability, with  $K_D$  values ranging from 4.49 nM to 72.7 pM (**Fig. S6**).

132

### 133 **Nbs block RBD-ACE2 interaction**

134 SARS-CoV-2 infection is initiated by the interaction of RBD and ACE2. To assess the ability of the Nbs  
135 in blocking RBD-ACE2 interaction, we performed competitive ELISA. Except for aRBD-42, which has  
136 the lowest RBD-binding affinity, all other Nbs (**Fig. 4A**) and their Fc fusions (**Fig. 4B**) effectively  
137 blocked the binding between ACE2-Fc and RBD in a dose dependent manner. Compare to monovalent  
138 Nbs, Nb-Fc fusions showed enhanced blocking activities with 5 to 90-fold decrease in half-maximal  
139 inhibitory concentration ( $IC_{50}$ ). The Nb-Fc fusions inhibited the binding of 10 nM ACE2-Fc to RBD with  
140  $IC_{50}$  values at nanomolar level, consistent with their binding affinities.

141

### 142 **High affinity hetero-bivalent antibodies constructed depend on epitope grouping**

143 To find out whether the Nbs bind to overlapping epitopes, the ability of the Nbs to compete with each  
144 other for ACE2 binding was studied with ELISA. The Nbs were serially diluted (ranging from 2.5 to  
145 10240 nM) and used to compete with 5 nM of a Nb-TEV-Fc fusion to bind SARS-CoV-2 RBD coated  
146 on plates (**Fig. 5A-F**). The competition was summarized in **Fig. 5G**. Based on these grouping and an  
147 additional SEC results (**Fig. 6A and B**), we engineered two hetero-bivalent Nbs, namely aRBD-2-5 and  
148 aRBD-2-7, by connecting aRBD-2 head-to-tail with aRBD-5 and aRBD-7 through a  $(GGGGS)_3$  flexible  
149 linker, respectively. They were also expressed in 293F cells and purified as above (**Fig. 6C**). SEC  
150 indicated aRBD-2-5 and aRBD-2-7 were monomeric in solution (**Fig. 6D and E**), and circular dichroism  
151 spectrum analysis showed they were also highly stable in solution (**Fig. S4h, i**).

152 The RBD binding activities of aRBD-2-5 and aRBD-2-7 were studied with SEC (**Fig. 6D and E**) and  
153 SPR. In contrast to the monovalent Nbs, the hetero-bivalent aRBD-2-5 and aRBD-2-7 showed a greatly  
154 enhanced binding affinity, with  $K_D$  values of 59.2 pM and 0.25 nM, respectively (**Fig. 6F and G**).  
155 Similarly, their Fc fusions also showed an enhanced binding affinity, with  $K_D$  values of 12.3 pM and 0.22  
156 nM, respectively (**Fig. S6H and I**).

157

### 158 **Hetero-bivalent Nbs exhibit potent neutralizing ability against live SARS-CoV-2**

159 To assess the ability of the Nbs in neutralizing SARS-CoV-2, we developed a SARS-CoV-2 micro-  
160 neutralization assay and assessed representative Nbs in this assay. Nbs that were serially diluted to  
161 different concentrations were incubated with ~ 200 PFU of SARS-CoV-2 and inoculated onto Vero E6  
162 cells in 96-well plates. The inoculum was removed after 1 hour, and the cells were covered with semi-  
163 solid medium for 2 days, before the infection was assessed by an immunofluorescence assay utilizing  
164 antibodies specific for SARS-CoV-2 N protein. Three representative monomeric Nbs, aRBD-2, aRBD-  
165 5, and aRBD-7, showed only modest level of neutralization at antibody concentrations of 33 to 100  $\mu$ g/ml  
166 (**Fig. S7A-C**). aRBD-2 was more effective than aRBD-5 and aRBD-7 in neutralizing SARS-CoV-2,  
167 correlating with its higher binding affinity to RBD. By contrast, the dimeric Nbs showed greatly  
168 enhanced neutralizing potency. The homo-bivalent aRBD-2-Fc, aRBD-5-Fc and aRBD-7-Fc exhibited  
169 50% neutralization dose ( $ND_{50}$ ) of 0.092  $\mu$ g/mL (~1.12 nM), 0.440  $\mu$ g/mL (~5.34 nM) and 0.671  $\mu$ g/mL  
170 (~8.02 nM), respectively (**Fig. S8A-C and Fig. 7E**), again correlating with their RBD binding affinities.  
171 Interestingly, the hetero-bivalent Nbs exhibited an even higher neutralizing potency than the homo-  
172 dimeric Nbs. The fitted  $ND_{50}$  for aRBD-2-5 and aRBD-2-7 is 1.22 ng/mL (~0.043 nM) and 3.18 ng/mL  
173 (~0.111 nM), respectively (**Fig. 7A, B and E**). The Fc fusions of the hetero-bivalent Nbs did not further  
174 increase the neutralization potency. The  $ND_{50}$  for aRBD-2-5-Fc and aRBD-2-7-Fc is 11.8 ng/mL (~0.107

175 nM) and 6.76 ng/mL (~0.0606 nM), respectively (**Fig. 7C, D and E**).

176

## 177 **Discussion**

178 The infection of epithelial cells by SARS-CoV-2 is initiated by the interaction between the Spike RBD  
179 and ACE2 [25, 32]. Hence, RBD-targeting antibodies hold promise as prophylactics and therapeutics for  
180 SARS-CoV-2. Here, seven unique Nbs were isolated from RBD-immunized alpacas and their CDR  
181 sequences are distinct from other reported Nbs [33-41]. Four of the Nbs exhibited high affinity of low-  
182 nanomolar  $K_D$  (**Fig. 3**), similar to recently reported natural [33, 34] and synthetic Nbs [35-37]. We also  
183 measured the RBD-binding affinity of the Nb-Fc fusions. Due to the bivalent nature and ~6-fold increase  
184 in the molecular weight, most of the Nb-Fc chimeric antibodies showed a higher affinity ( $K_D$  ranging  
185 from 72.7 pM to 4.5 nM) than their monomeric counterparts (**Fig. S6**). This affinity is even higher than  
186 that of some monoclonal antibodies isolated from lymphocytes of convalescent COVID-19 patients [16-  
187 18].

188 Except for the Nb with the lowest affinity for RBD (aRBD-42;  $K_D$  of 113 nM), the other six Nbs are  
189 all capable of blocking the interaction between ACE2 and RBD. aRBD-2, aRBD-3 and aRBD-54, which  
190 had a higher RBD-binding affinity, showed a stronger ACE-RBD blocking capacity than aRBD-5 and  
191 aRBD-41 (**Fig. 4A**). However, aRBD-7, which had a similarly high RBD binding affinity of 3.31 nM,  
192 only exhibited a weak ACE2-RBD blocking activity (**Fig. 4A**). We thus infer that different Nbs may  
193 occupy different epitopes on RBD, leading to varying strength of ACE2 binding interference. The  
194 epitopes of some Nbs may overlap more closely with that of ACE2. Interestingly, even when the Nbs  
195 with a relatively weak ACE2-RBD blocking ability were fused with IgG1 Fc to form homodimers, their  
196 blocking ability were increased more than 75-fold (**Fig. 4A and B**). This effect is probably due to the  
197 increased apparent RBD-binding affinity by dimerization as well as the additional steric hindrance caused  
198 by the increased size. Further investigations are needed to understand the underlying mechanisms.

199 According to grouping results of the seven Nbs, two hetero-bivalent antibodies were constructed by  
200 fusing aRBD-2 to aRBD-5 and aRBD-7 tail-to-head with a flexible linker, which achieved a more than  
201 10-fold increase in RBD-binding affinity (**Fig. 6F and G**). Consistent with the increased affinity and  
202 steric hindrance, the SARS-CoV-2 neutralization potency of aRBD-2-5 and aRBD-2-7 were greatly  
203 enhanced, with  $ND_{50}$  of 1.2 ng/mL (~0.043 nM) and 3.2 ng/mL (~0.111 nM) (**Fig. 7**). The neutralization  
204 potency of our aRBD-2-5 and aRBD-2-7 appears to be better than other previously reported Nbs, their  
205 engineered form [33-40], and some traditional human monoclonal antibodies [13-18]. However, they  
206 appear to be less potent than a recently reported multivalent Nb [41].

207 In summary, we have identified several high-affinity natural Nbs with RBD-ACE2 blocking ability  
208 and two hetero-bivalent Nbs with potent SARS-CoV-2 neutralization capacity. Alpaca  $V_{HH}$  has a high  
209 degree of homology with human  $V_{H3}$ , so it has low immunogenicity in humans [42, 43]. These Nbs can  
210 be further improved with respect to their antiviral function through affinity maturation or genetic  
211 modification, potentially serving as therapeutics for treating COVID-19.

212

## 213 **Material and Methods**

### 214 **Protein expression and purification**

215 The coding sequences for SARS-CoV-2 RBD (aa 321-591), SARS-CoV-2 RBD (aa 321-591, N501Y),  
216 SARS-CoV-2 S1 (aa 1-681), SARS-CoV-1 RBD (aa 309-540), human ACE2 extracellular domain (aa  
217 19-615) and the identified Nbs, were appended with a TEV enzyme site and a human IgG1 Fc at the C-  
218 terminus as well as the IFNA1 signal peptide at the N-terminus. The fusions were cloned into the  
219 mammalian expression vector pTT5. The expression vectors were transiently transfected to human  
220 HEK293F cells with polyethylenimine (Polyscience). Three days later, cell supernatants were obtained  
221 by centrifugation at 3000 g for 10 min, diluted 1:1 with the running buffer (20 mM Na<sub>2</sub>HPO<sub>4</sub>, 150 mM  
222 NaCl, pH 7.0), and loaded on protein A column. The bound protein was eluted with 100 mM acetic acid  
223 on ÄKTA pure (GE healthcare). To remove IgG1 Fc, the purified fusion proteins were first digested with  
224 6xHis-tagged TEV enzyme. Protein A (Protein G for nanobodies) and Ni NTA were then used  
225 sequentially to remove the undigested fusion protein, Fc and the TEV enzyme. Fc-free recombinant  
226 proteins were collected from the flow-through. Protein purity was estimated by SDS-PAGE (**Fig. S1**),  
227 and the concentration was measured using the spectrophotometer (analytikjena).

228

### 229 **Phage display library construction**

230 The experiments involving alpacas were approved by a local ethics committee. Two female alpacas were  
231 immunized by 2 times of subcutaneous injection and 1 time of intramuscular injection, each with 500 µg  
232 SARS-CoV-2 RBD in PBS, which was emulsified with an equal volume of Freund's adjuvant (Sigma  
233 Aldrich). Two weeks after the final boost, more than  $1 \times 10^7$  lymphocytes were isolated from peripheral  
234 blood by Ficoll 1.077 (Sigma Aldrich) separation, and the total RNA from the lymphocytes was isolated  
235 using Total RNA kit (omegabiotek) according to the manufacturer's protocol. First strand cDNA  
236 synthesis was performed with 4 µg of total RNA per reaction using PrimeScript™ II 1st Strand cDNA  
237 Synthesis Kit and oligo-dT primer (TAKARA) according to the manufacturer's protocol. The variable  
238 domain of heavy-chain only antibody (V<sub>H</sub>H) was amplified by PCR using the following primers  
239 (Forward primer: GCTGCACAGCCTGCTATGGCACAGKTGCAGCTCGTGGAGTCTGGGGG;  
240 Reverse primer: GAGTTTTTGTTCGGCTGCTGCTGAGGAGACGGTGACCTGGGTCCCC). The  
241 phagemid pR2 was amplified by PCR using the following primers (Forward primer:  
242 AGCAGCCGAACAAAACTCATCTCAGAAGAG; Reverse primer:  
243 CCATAGCAGGCTGTGCAGCATAGAAAGGTACCACTAAAGGAATTGC). Two pmol of the V<sub>H</sub>H  
244 fragments and 0.5 pmol of the amplified pR2 vector were mixed and diluted to 50 µl. An equal volume  
245 of 2x Gibson Assembly mix was added to the mixture and incubated at 50 °C for 1 hour. The ligation was  
246 cleaned up by Cycle Pure Kit (omegabiotek) and transformed into TG1 electro-competent cells in 0.1 cm  
247 electroporation cuvette using BTX ECM 399 Electroporation System (Harvard Apparatus) with the  
248 following setting: 2.5 kV, 5 ms. The transformants were spread on five 150 mm TYE agar plates  
249 supplemented with 2% glucose and 100 µg/mL ampicillin, followed by overnight culturing at 37 °C. The  
250 colonies were scraped from the plates with a total of 20 mL 2×TY medium and thoroughly mixed. 200  
251 µL of the liquid was inoculated to 200 mL 2×TY to amplify the library. Phage particles displaying V<sub>H</sub>H  
252 were rescued from the library using KM13 helper phage.

253

### 254 **Biopanning and selection of positive clones**

255 Two rounds of panning were performed. Immuno MaxiSorb plates (Nunc) were coated with 0.1 mL of  
256 SARS-CoV-2 RBD solution (100 and 20 µg/mL in the 1st and 2nd round, respectively). Control wells

257 without antigen coating were used in parallel in every round of panning. After blocking with MPBS (PBS  
258 supplemented with 5% milk powder) for 2 h at room temperature (RT),  $1 \times 10^{11}$  pfu of the library phages  
259 were added for the 1st round of selection. The wells were washed with PBST (PBS supplemented with  
260 0.1% tween-20) for 20 times to remove the unbound phages. Bound phages were eluted by digestion  
261 with 100  $\mu$ L of 0.5 mg/mL trypsin for 1 h at RT. The eluted phages were used to infect E. coli TG1 for  
262 titer determination and amplification. The 2nd round of panning was performed similarly with the  
263 following differences: the amount of input phage was  $1 \times 10^8$  pfu, the washing time was 30 times, and the  
264 concentration of tween-20 in washing buffer was 0.2%.

265 Thirty-one individual clones from each round of panning were picked and identified using monoclonal  
266 phage ELISA. The monoclonal phage was rescued with helper phage KM13 and added to the well coated  
267 with 0.1  $\mu$ g of RBD. After 1 h of incubation at RT, the wells were washed 4 times with PBST and added  
268 with HRP-anti-M13 antibody. After washing 4 times with PBST, TMB (Beyotime) was added to each  
269 well and incubated in the dark at RT for 2 min. The chromogenic reaction was stopped with 50  $\mu$ L of 1  
270 M sulfuric acid, and OD<sub>450 nm</sub> was determined. The clone with OD<sub>450 nm</sub> that was 20 times higher than  
271 that of the control well is defined as a positive clone. The phagemids extracted from the positive clones  
272 were sequenced.

273

#### 274 **Size-exclusion chromatography**

275 The interaction of SARS-CoV-2 RBD and the Nbs in solution was studied with gel filtration. SARS-  
276 CoV-2 RBD, Nbs and their mixture (1.6 nmol of SARS-CoV-2 RBD mixed with 1.6 nmol of Nbs) were  
277 run over a Superdex 75 column (GE healthcare) at a flow rate of 0.5 mL/min with AKTA pure.

278

#### 279 **Enzyme-linked immunosorbent assay (ELISA)**

280 Immuno MaxiSorb plates (Nunc) were coated and blocked as above. For non-competitive ELISA of  
281 purified Nb-Fc and ACE2-Fc binding assay, Nb-Fc and ACE2-Fc solutions that were serially diluted 1:3  
282 were added to the plates and incubated for 1 h at RT. After washing with PBST 4 times, the bound Nb-  
283 Fc and ACE2-Fc were detected with a monoclonal anti-IgG1 Fc-HRP antibody (sino Biological). For  
284 characterizing the epitope competition between the identified Nbs, serially 1:4 diluted Nb solutions  
285 (ranging from 2.5 to 10240 nM) were mixed with 5 nM of Nb-Fc solutions. After incubation in RBD  
286 coated wells and standard washing, bound Nb-Fc was detected with a monoclonal anti-IgG1 Fc-HRP  
287 antibody. For ACE2-RBD blocking assay, serially 1:3 diluted Nb solutions (ranging from 0.046 to 900  
288 nM) and Nb-Fc solution (ranging from 0.023 to 450 nM) were mixed with 10 nM of ACE2-Fc and 10  
289 nM of biotinylated ACE2-Fc, respectively. After incubation in RBD coated wells and standard washing,  
290 bound ACE2-Fc and biotinylated ACE2-Fc was detected with an anti-IgG1 Fc-HRP antibody or HRP-  
291 streptavidin, respectively. The chromogenic reaction and OD<sub>450 nm</sub> measurement were performed  
292 similarly as described for phage ELISA.

293

#### 294 **Circular Dichroism (CD)**

295 Secondary structure and thermal stabilities of identified Nbs were studied by CD spectra using a  
296 Chirascan Spectrometer (Applied Photophysics). Prior to CD measurements, the sample buffer was  
297 changed to phosphate-buffered saline (PBS), and the protein concentration was adjusted to 0.3 mg/ml.  
298 The CD spectra were acquired for each sample from 180 to 260 nm using a 1 mm path length cell. For  
299 thermal titration, CD spectra were acquired between 20  $^{\circ}$ C to 95  $^{\circ}$ C with temperature steps of 2.5  $^{\circ}$ C. CD  
300 signals at 205 nm were used to characterize the structural changes during thermal titration. Each



301 experiment was repeated twice, and the data were fitted with Prism to obtain the  $T_m$  values.

302

### 303 **Surface Plasmon Resonance (SPR)**

304 SPR measurements were performed at 25 °C using a BIAcore T200 system. SARS-CoV-2 RBD was  
305 diluted to a concentration of 15 µg/mL with sodium acetate (pH 4.5) and immobilized on a CM5 chip  
306 (GE Healthcare) at a level of ~150 response units (RU). All proteins were exchanged into the running  
307 buffer (PBS (pH 7.4) supplemented with 0.05% Tween 20), and the flow rate was 30 µL/min. The blank  
308 channel of the chip served as the negative control. For affinity measurements, a series of different  
309 concentrations of antibodies were flowed over the sensorchip. After each cycle, the chip was regenerated  
310 with 50 mM NaOH buffer for 60-120 seconds. The sensorgrams were fitted with 1:1 binding model with  
311 the Biacore evaluation software.

312

### 313 **SARS-CoV-2 neutralization assay**

314 Nbs and Nb-Fc fusions in a three-fold dilution concentration series were incubated with ~200 plaque-  
315 forming units (PFU) of SARS-CoV-2 (USA-WA1/2020 isolate) for 30 minutes. The antibody and virus  
316 mixture were then added to Vero E6 cells in 96-well plates (Corning). After one hour, the supernatant  
317 was removed from the wells, and the cells were washed with PBS and overlaid with DMEM containing  
318 0.5% methyl cellulose. After 2 days of infection, the cells were fixed with 4% paraformaldehyde,  
319 permeabilized with 0.1% Triton-100, blocked with DMEM containing 10% FBS, and stained with a  
320 rabbit monoclonal antibody against SARS-CoV-2 NP (GeneTex, GTX635679) and an Alexa Fluor 488-  
321 conjugated goat anti-mouse secondary antibody (ThermoFisher Scientific). Hoechst 33342 was added in  
322 the final step to counterstain the nuclei. Fluorescence images of the entire well were acquired with a 4x  
323 objective in a Cytation 5 (BioTek). The total number of cells, as indicated by the nuclei staining, and the  
324 infected cells, as indicated by the NP staining, were quantified with the cellular analysis module of the  
325 Gen5 software (BioTek). All experiments involving live SARS-CoV-2 were carried out under BSL-3  
326 containment. A Log-logistic model[44] was used to model the dose-response curves of the antibodies.  
327 The data are fitted to the model with the drc package in R to obtain the 95% confidence intervals and  
328  $ND_{50}$ . It should be noted that all above Nbs were lyophilized at concentration of 2-5 mg/mL and kept at  
329 room temperature for one week for transportation. The lyophilized Nbs were re-dissolved in ddH<sub>2</sub>O  
330 before they were used in neutralization assay.

331

332

333

### 334 **Acknowledgements**

335 We would like to thanks all the staff who participated in this work for their important contribution. This  
336 work is supported by the Strategic Priority Research Program of the Chinese Academy of Sciences (Grant  
337 No. XDB29030104), the National Natural Science Foundation of China (Grant No.: 31870731,  
338 31971129 and U1732109), the 100 Talents Programme of The Chinese Academy of Sciences, the  
339 Fundamental Research Funds for the Central Universities (WK2070000108), the COVID-19 special task  
340 grant supported by Chinese Academy of Science Clinical Research Hospital (Hefei) (Grant No.  
341 YD2070002017), the Innovation team cultivation fund of USTC, Jack Ma Foundation and the New  
342 medical science fund of USTC (WK2070000130). The *in vitro* SARS-CoV-2 neutralization experiments  
343 were supported by a COVID-19 pilot grant from UTHSCSA to Y.X.

344

345 **Conflict of interest**

346 All the authors have no conflicts of interest. Patents have been applied (No.: CN202011037351.1 and  
347 CN202011037426.6, Filing Date: Sep 25, 2020).

348

349 **Author Contributions**

350 Tengchuan Jin and Yan Xiang provide funding, designed the study, participated in data analysis, and  
351 wrote the manuscript. Huan Ma and Weihong Zeng designed the study, performed the majority of  
352 experiments, analyzed the data and drafted the manuscript. Other authors participated in the experiments  
353 and/or writing of the manuscript.

354

355 **References**

356

- 357 1. Ksiazek, T.G., et al., *A novel coronavirus associated with severe acute respiratory syndrome*. N  
358 Engl J Med, 2003. **348**(20): p. 1953-66.
- 359 2. Zaki, A.M., et al., *Isolation of a novel coronavirus from a man with pneumonia in Saudi Arabia*.  
360 N Engl J Med, 2012. **367**(19): p. 1814-20.
- 361 3. Zhou, P., et al., *A pneumonia outbreak associated with a new coronavirus of probable bat origin*.  
362 Nature, 2020. **579**(7798): p. 270-273.
- 363 4. Lu, R., et al., *Genomic characterisation and epidemiology of 2019 novel coronavirus:  
364 implications for virus origins and receptor binding*. Lancet, 2020. **395**(10224): p. 565-574.
- 365 5. Ledford, H., D. Cyranoski, and R. Van Noorden, *The UK has approved a COVID vaccine - here's  
366 what scientists now want to know*. Nature, 2020. **588**(7837): p. 205-206.
- 367 6. (FDA), U.S.F.a.D.A. *FACT SHEET FOR HEALTHCARE PROVIDERS ADMINISTERING VACCINE  
368 (VACCINATION PROVIDERS)*. 2020; Available from:  
369 <https://www.fda.gov/media/144413/download>.
- 370 7. (FDA), U.S.F.a.D.A. *FACT SHEET FOR HEALTH CARE PROVIDERS EMERGENCY USE  
371 AUTHORIZATION (EUA) OF VEKLURY® (remdesivir)*. . 2020; Available from:  
372 <https://www.fda.gov/media/137566/download>.
- 373 8. *World first coronavirus treatment approved for NHS use by government*. Available from:  
374 [https://www.gov.uk/government/news/world-first-coronavirus-treatment-approved-for-nhs-  
375 use-by-government](https://www.gov.uk/government/news/world-first-coronavirus-treatment-approved-for-nhs-use-by-government).
- 376 9. Ma, H., et al., *Serum IgA, IgM, and IgG responses in COVID-19*. Cell Mol Immunol, 2020. **17**(7):  
377 p. 773-775.
- 378 10. Xiang, F., et al., *Antibody Detection and Dynamic Characteristics in Patients With Coronavirus  
379 Disease 2019*. Clin Infect Dis, 2020. **71**(8): p. 1930-1934.
- 380 11. Zhao, J., et al., *Antibody Responses to SARS-CoV-2 in Patients With Novel Coronavirus Disease  
381 2019*. Clin Infect Dis, 2020. **71**(16): p. 2027-2034.
- 382 12. Ma, H., et al., *Decline of SARS-CoV-2-specific IgG, IgM and IgA in convalescent COVID-19  
383 patients within 100 days after hospital discharge*. Sci China Life Sci, 2020: p. 1-4.
- 384 13. Wang, C., et al., *A human monoclonal antibody blocking SARS-CoV-2 infection*. Nat Commun,  
385 2020. **11**(1): p. 2251.
- 386 14. Chen, X., et al., *Human monoclonal antibodies block the binding of SARS-CoV-2 spike protein to  
387 angiotensin converting enzyme 2 receptor*. Cell Mol Immunol, 2020. **17**(6): p. 647-649.
- 388 15. Shi, R., et al., *A human neutralizing antibody targets the receptor-binding site of SARS-CoV-2*.

- 389 Nature, 2020. **584**(7819): p. 120-124.
- 390 16. Ju, B., et al., *Human neutralizing antibodies elicited by SARS-CoV-2 infection*. Nature, 2020.  
391 **584**(7819): p. 115-119.
- 392 17. Cao, Y., et al., *Potent Neutralizing Antibodies against SARS-CoV-2 Identified by High-Throughput*  
393 *Single-Cell Sequencing of Convalescent Patients' B Cells*. Cell, 2020. **182**(1): p. 73-84 e16.
- 394 18. Rogers, T.F., et al., *Isolation of potent SARS-CoV-2 neutralizing antibodies and protection from*  
395 *disease in a small animal model*. Science, 2020. **369**(6506): p. 956-963.
- 396 19. Duan, K., et al., *Effectiveness of convalescent plasma therapy in severe COVID-19 patients*. Proc  
397 Natl Acad Sci U S A, 2020. **117**(17): p. 9490-9496.
- 398 20. Zhang, L., et al., *Anti-SARS-CoV-2 virus antibody levels in convalescent plasma of six donors who*  
399 *have recovered from COVID-19*. Aging (Albany NY), 2020. **12**(8): p. 6536-6542.
- 400 21. Cao, X., *COVID-19: immunopathology and its implications for therapy*. Nat Rev Immunol, 2020.  
401 **20**(5): p. 269-270.
- 402 22. De Meyer, T., S. Muyldermans, and A. Depicker, *Nanobody-based products as research and*  
403 *diagnostic tools*. Trends Biotechnol, 2014. **32**(5): p. 263-70.
- 404 23. Van Heeke, G., et al., *Nanobodies® as inhaled biotherapeutics for lung diseases*. Pharmacol Ther,  
405 2017. **169**: p. 47-56.
- 406 24. Larios Mora, A., et al., *Delivery of ALX-0171 by inhalation greatly reduces respiratory syncytial*  
407 *virus disease in newborn lambs*. MAbs, 2018. **10**(5): p. 778-795.
- 408 25. Hoffmann, M., et al., *SARS-CoV-2 Cell Entry Depends on ACE2 and TMPRSS2 and Is Blocked by*  
409 *a Clinically Proven Protease Inhibitor*. Cell, 2020. **181**(2): p. 271-280 e8.
- 410 26. Wang, Q., et al., *Structural and Functional Basis of SARS-CoV-2 Entry by Using Human ACE2*.  
411 Cell, 2020. **181**(4): p. 894-904 e9.
- 412 27. Shang, J., et al., *Structural basis of receptor recognition by SARS-CoV-2*. Nature, 2020.  
413 **581**(7807): p. 221-224.
- 414 28. Lan, J., et al., *Structure of the SARS-CoV-2 spike receptor-binding domain bound to the ACE2*  
415 *receptor*. Nature, 2020. **581**(7807): p. 215-220.
- 416 29. Yan, R., et al., *Structural basis for the recognition of SARS-CoV-2 by full-length human ACE2*.  
417 Science, 2020. **367**(6485): p. 1444-1448.
- 418 30. Wrapp, D., et al., *Cryo-EM structure of the 2019-nCoV spike in the prefusion conformation*.  
419 Science, 2020. **367**(6483): p. 1260-1263.
- 420 31. Leung, K., et al., *Early transmissibility assessment of the N501Y mutant strains of SARS-CoV-2*  
421 *in the United Kingdom, October to November 2020*. Eurosurveillance, 2021. **26**(1): p. 2002106.
- 422 32. Walls, A.C., et al., *Structure, Function, and Antigenicity of the SARS-CoV-2 Spike Glycoprotein*.  
423 Cell, 2020. **181**(2): p. 281-292 e6.
- 424 33. Hanke, L., et al., *An alpaca nanobody neutralizes SARS-CoV-2 by blocking receptor interaction*.  
425 Nature Communications, 2020. **11**(1): p. 4420.
- 426 34. Huo, J., et al., *Neutralizing nanobodies bind SARS-CoV-2 spike RBD and block interaction with*  
427 *ACE2*. Nat Struct Mol Biol, 2020.
- 428 35. Sun, Z., et al., *Potent neutralization of SARS-CoV-2 by human antibody heavy-chain variable*  
429 *domains isolated from a large library with a new stable scaffold*. MAbs, 2020. **12**(1): p. 1778435.
- 430 36. Wu, Y., et al., *Identification of Human Single-Domain Antibodies against SARS-CoV-2*. Cell Host  
431 Microbe, 2020. **27**(6): p. 891-898 e5.
- 432 37. Chi, X., et al., *Humanized single domain antibodies neutralize SARS-CoV-2 by targeting the spike*

- 433                    *receptor binding domain*. Nat Commun, 2020. **11**(1): p. 4528.
- 434    38.    Schoof, M., et al., *An ultrapotent synthetic nanobody neutralizes SARS-CoV-2 by stabilizing*  
435                    *inactive Spike*. Science, 2020. **370**(6523): p. 1473-1479.
- 436    39.    Custódio, T.F., et al., *Selection, biophysical and structural analysis of synthetic nanobodies that*  
437                    *effectively neutralize SARS-CoV-2*. Nat Commun, 2020. **11**(1): p. 5588.
- 438    40.    Dong, J., et al., *Development of humanized tri-specific nanobodies with potent neutralization*  
439                    *for SARS-CoV-2*. Sci Rep, 2020. **10**(1): p. 17806.
- 440    41.    Xiang, Y., et al., *Versatile and multivalent nanobodies efficiently neutralize SARS-CoV-2*. Science,  
441                    2020. **370**(6523): p. 1479-1484.
- 442    42.    Jovčevska, I. and S. Muyldermans, *The Therapeutic Potential of Nanobodies*. BioDrugs, 2020.  
443                    **34**(1): p. 11-26.
- 444    43.    Morrison, C., *Nanobody approval gives domain antibodies a boost*. Nat Rev Drug Discov, 2019.  
445                    **18**(7): p. 485-487.
- 446    44.    Ritz, C., et al., *Dose-Response Analysis Using R*. PLoS One, 2015. **10**(12): p. e0146021.
- 447
- 448

449 **Figure legends**

450

**A**

| Rounds | Input phage (pfu)  | Output phage of blank well (pfu) | Output phage of antigen coating well (pfu) |
|--------|--------------------|----------------------------------|--------------------------------------------|
| 1      | $1 \times 10^{11}$ | 900                              | $7.06 \times 10^4$                         |
| 2      | $1 \times 10^8$    | 0                                | $2 \times 10^5$                            |

**B**

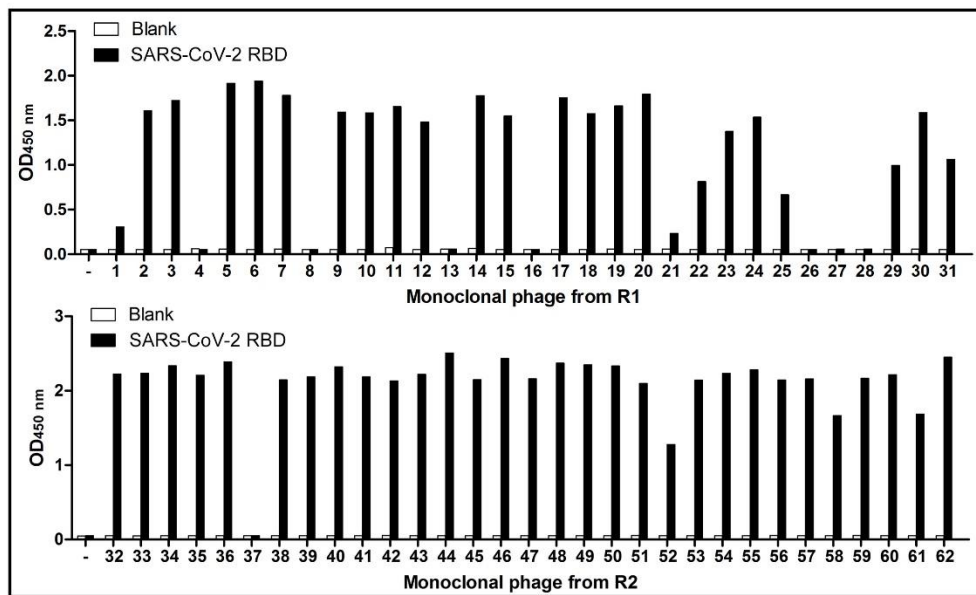

**C**

|         | <u>CDR1</u>           | <u>CDR2</u>                   |                               |
|---------|-----------------------|-------------------------------|-------------------------------|
| aRBD-2  | QVQLVESGGGLVQAGGSLRLS | CAASGRITYT. . . MGWFRQAPGKERE | FVAAMRWS. . DTDYADSLK 60      |
| aRBD-3  | QVQLVESGGGLVQPGGSLRLS | CAASGLTLDYYAIGWFRQAPGKEREGV   | SCISHPGGSTNYADSVK 65          |
| aRBD-5  | QVQLVESGGGLVQPGGTLRLS | CAASGFILDYYAIGWFRQAPGKEREGV   | SCISGSGGITNYTDSVK 65          |
| aRBD-7  | QLQLVESGGGLVQAGGSLRLS | CAASERTFSGGVMGWFRQRPCKERE     | FVAAIRWNGASTFYADSVK 65        |
| aRBD-41 | QVQLVESGGGLVQPGGSLRLS | CAASGFTSGHYAIGWFRQAPGKEREGV   | SCIGSSDGGSTYADSVK 65          |
| aRBD-42 | QLQLVESGGGLVQAGGSLRLS | CAASGRTFSSATMGWFRQAPGKEREF    | VAAISWSGLSRYADSVK 65          |
| aRBD-54 | QLQLVESGGGLVQPGGSLRLS | CAASGRTFG. SFGWFRQAPGQERDF    | VAAITWSGGSTYADSVK 64          |
|         |                       | <u>CDR3</u>                   |                               |
| aRBD-2  | GRFTISRDNANNAMYLQMN   | SLGPEDTAVYYCAAG. . . .        | EAWLARSTHHYDYGQGTQVTVS 117    |
| aRBD-3  | GRFTISRDNAKNTVYLQMN   | SLKPEDTAVYYCAASPLALFRLC       | VLPSPLPYDYGQGTQVTVS 127       |
| aRBD-5  | GRFTISRDNAKNTVYLQMN   | SLKPEDTAVYYCAPVSHTVVAGCA      | FEAWDFGSWGQGTQVTVS 127        |
| aRBD-7  | GRFTCSRDNAKNTGYLQMN   | SLTPEDTAVYYCARAVRTYASSDY      | YFQERTYDYGQGTQVTVS 127        |
| aRBD-41 | GRFTISRDNAKNTVYLQMN   | SLKPEDTAVYYCAAG. . .          | LWYGRSLNS. FDYDYGQGTQVTVS 123 |
| aRBD-42 | GRFTISRDNAEENTVYLQMN  | SLKTEDTAVYYCAADS. WGC         | SGLCYDARQYDYGQGTQVTVS 126     |
| aRBD-54 | GRFTISRDNAEENTVYLQMN  | SLKPEDTAVYYCAAR. . .          | ISSAYTRSSSYAYYGQGTQVTVS 122   |

451

452 **Fig. 1. Isolation of anti-SARS-CoV-2 RBD Nbs from an immunized phage display library. (A)**

453 Enrichment results after panning on SARS-CoV-2 RBD. (B) Results of monoclonal phage ELISA.

454 Randomly picked 31 individual clones from the 1st round of panning and 2nd round of panning were

455 monitored against SARS-CoV-2 RBD and negative control (PBS). (C) Amino acid sequence of the

456 isolated seven anti-RBD Nbs.

457

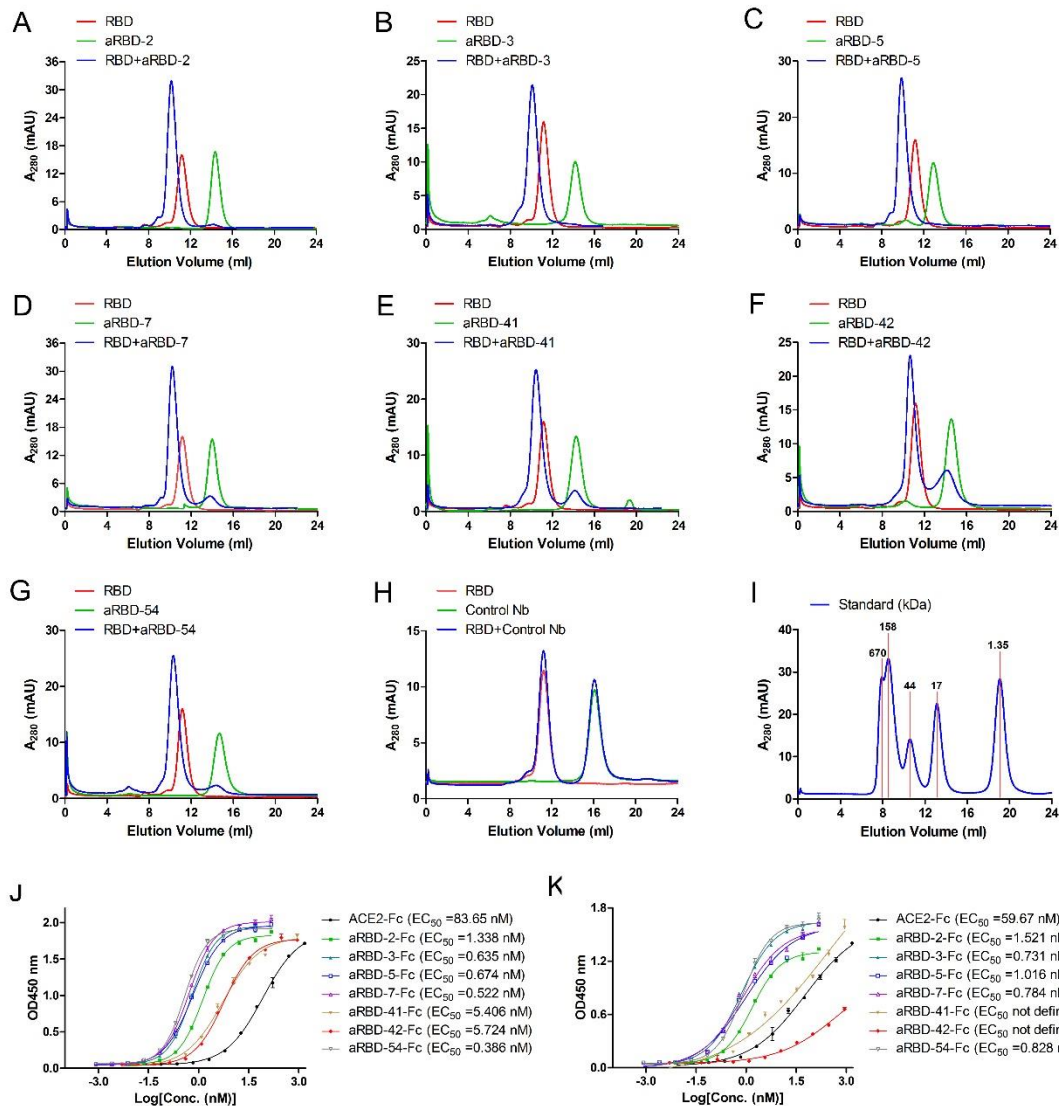

458

459 **Fig. 2. Size-exclusion chromatography (SEC) and ELISA analysis of interaction between SARS-**  
 460 **CoV-2 RBD and Nbs in solution.** SARS-CoV-2 RBD, Nbs and their 1:1 molar mixture were loaded  
 461 over a Superdex 75 column (GE healthcare), respectively. (A)-(G) is the analysis curve of the seven Nbs,  
 462 respectively; (H) is the curve of a negative control Nb; (I) is the curve of standard. If the Nbs could bind  
 463 RBD to form complex, elution peak will move forward. SARS-CoV-2 RBD (J) and spike entire  
 464 ectodomain (K) binding abilities of the purified Nb-Fc fusions were characterized using ELISA.  $EC_{50}$   
 465 was calculated by fitting the OD<sub>450</sub> from serially diluted antibody with a sigmoidal dose-response curve.  
 466 Error bars indicate mean  $\pm$ SD from two independent experiments.

467

468

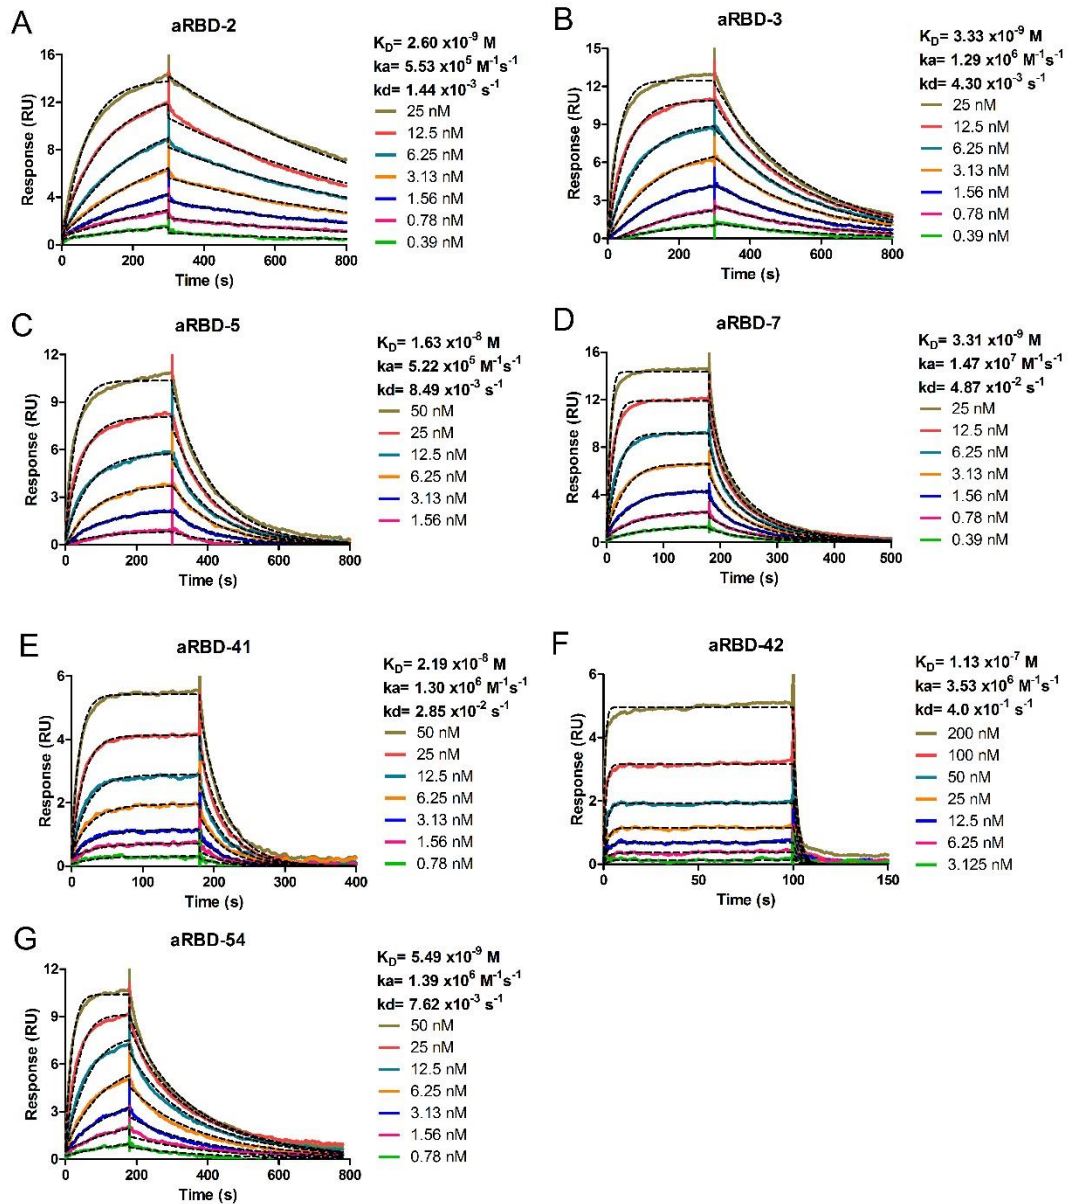

469

470 **Fig. 3. Characterization of binding affinity of isolated Nbs using SPR.** Binding kinetics of aRBD-2  
471 (A), aRBD-3 (B), aRBD-5 (C), aRBD-7 (D), aRBD-41 (E), aRBD-42 (F) and aRBD-54 (G) was  
472 measured by SPR, respectively. The SARS-CoV-2 RBD was immobilized onto a CM5 sensor chip. Nbs  
473 with serially 1:1 dilutions were injected and monitored by Biacore T200 system. The actual responses  
474 (colored lines) and the data fitted to a 1:1 binding model (black dotted lines) are shown.

475

476

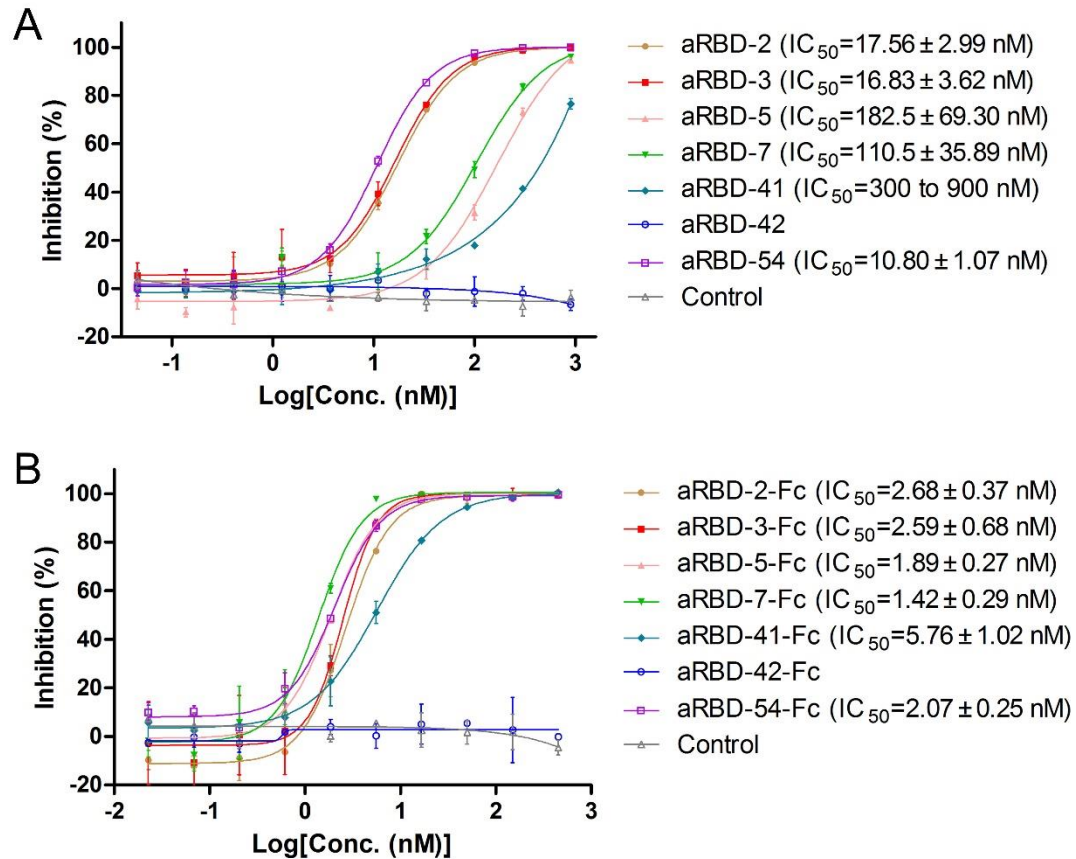

477

478 **Fig. 4. RBD-ACE2 blocking activities of isolated Nbs and their Fc fusions characterized with**  
479 **competitive ELISA.** Competitive ELISA of ACE2-Fc binding to SARS-CoV-2 RBD immobilized on the  
480 plates by increasing concentrations of Nbs (A) or Nb-Fc fusions(B). After the competition, bound ACE2-  
481 Fc (A) or biotinylated ACE2-Fc (B) was detected by HRP-anti-IgG1 Fc antibody or streptavidin-HRP,  
482 respectively. Error bars indicate mean  $\pm$  SD from two independent experiments.  $IC_{50}$  was calculated by  
483 fitting the inhibition from serially diluted antibody to a sigmoidal dose-response curve.

484

485



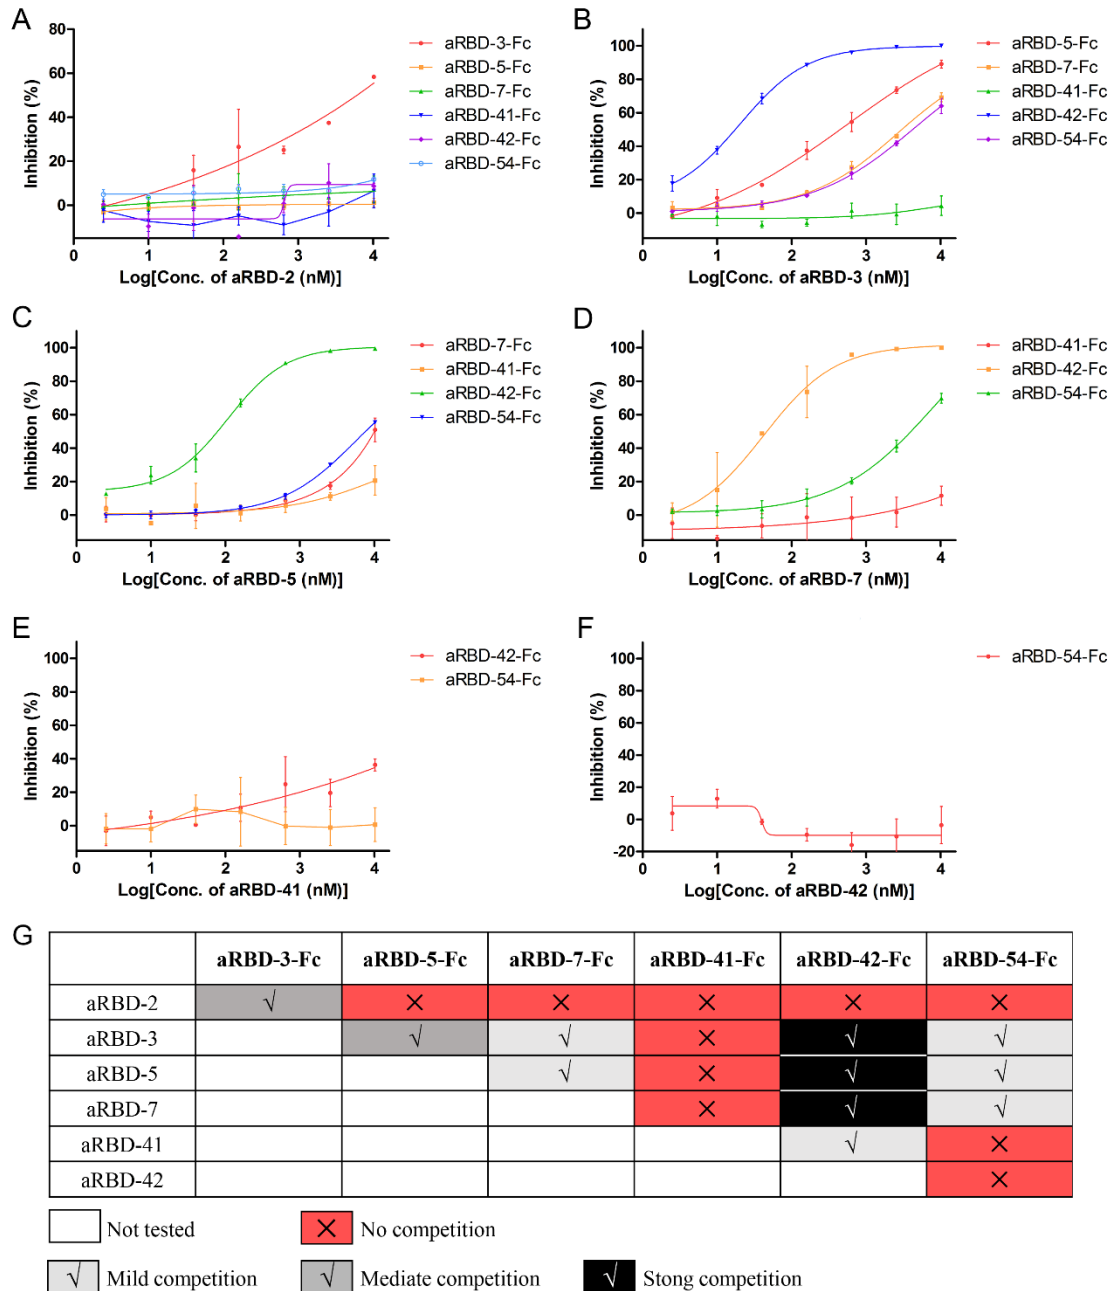

486

487

488

489

490

491

492

493

494

495

496

497

498

**Fig. 5. Epitope grouping results of the seven identified nanobodies.** aRBD-2 (A), aRBD-3 (B), aRBD-5 (C), aRBD-7 (D), aRBD-41 (E) and aRBD-42 (F) was competed with other Nb-Fc fusions to bind SARS-CoV-2 RBD immobilized on the plates. Competition was determined by the reduction of HRP-anti-IgG1 Fc induced chemiluminescence signal (OD<sub>450 nm</sub>). The inhibition was calculated by comparing to the Nb negative control well. Error bars indicate mean ± SD from two independent experiments. Competition strength is negatively correlated with OD<sub>450 nm</sub> signal, the strength was summarized (G). aRBD-2 and aRBD-41 only showed moderate and mild competition with aRBD-3 and aRBD-42 for RBD binding, respectively. aRBD-3, aRBD-5, aRBD-7 and aRBD-42 showed mild to strong competition with each other for RBD binding. aRBD-3, aRBD-5, aRBD-7 and aRBD-54 also showed mild to strong competition with each other for RBD binding. aRBD-42 had no competition with aRBD-54.

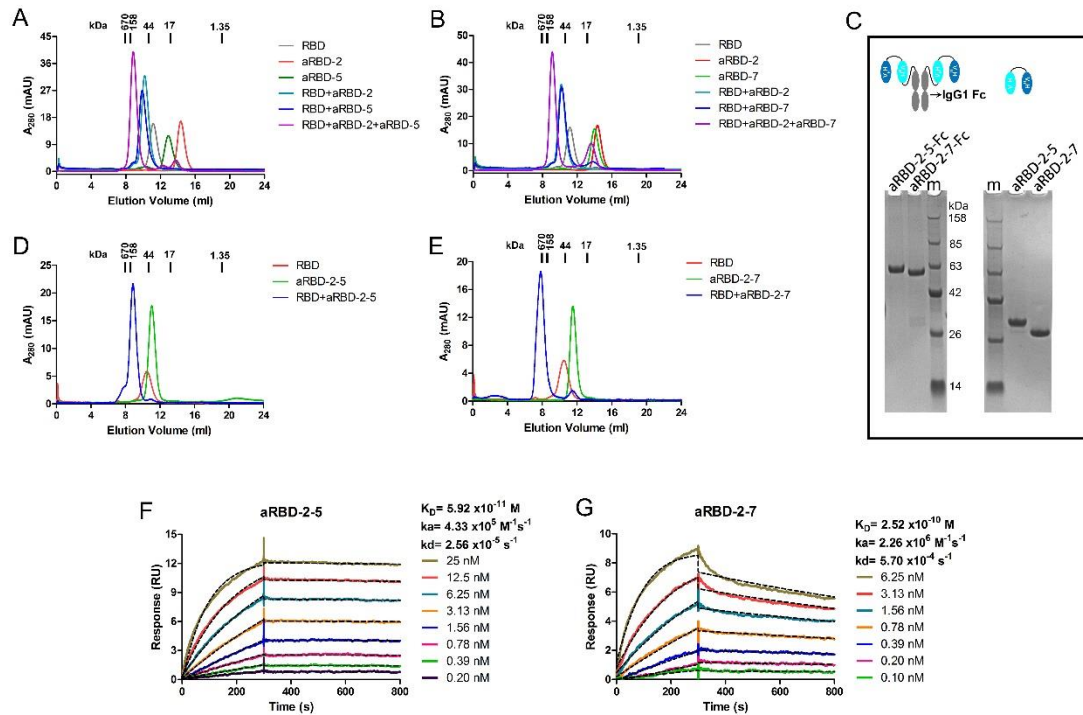

499

500 **Fig. 6. Preparation and characterization of the hetero-bivalent Nbs.** (A) SEC profiling of RBD,  
 501 aRBD-2 and aRBD-5 complex. (B) SEC profiling of RBD, aRBD-2 and aRBD-7 complex. (C) Reduced  
 502 SDS-PAGE results of purified aRBD-2-5, aRBD-2-7 and their Fc fusions. (D) SEC profiling of RBD and  
 503 aRBD-2-5 complex. (E) SEC profiling of RBD and aRBD-2-7 complex. The SARS-CoV-2 RBD binding  
 504 kinetics of aRBD-2-5 (F) and aRBD-2-7 (G) was measured by SPR, respectively. The two hetero-bivalent  
 505 Nbs with serially 1:1 dilutions were injected and monitored by Biacore T200 system. The actual  
 506 responses (colored lines) and the data fitted to a 1:1 binding model (black dotted lines) are shown.

507

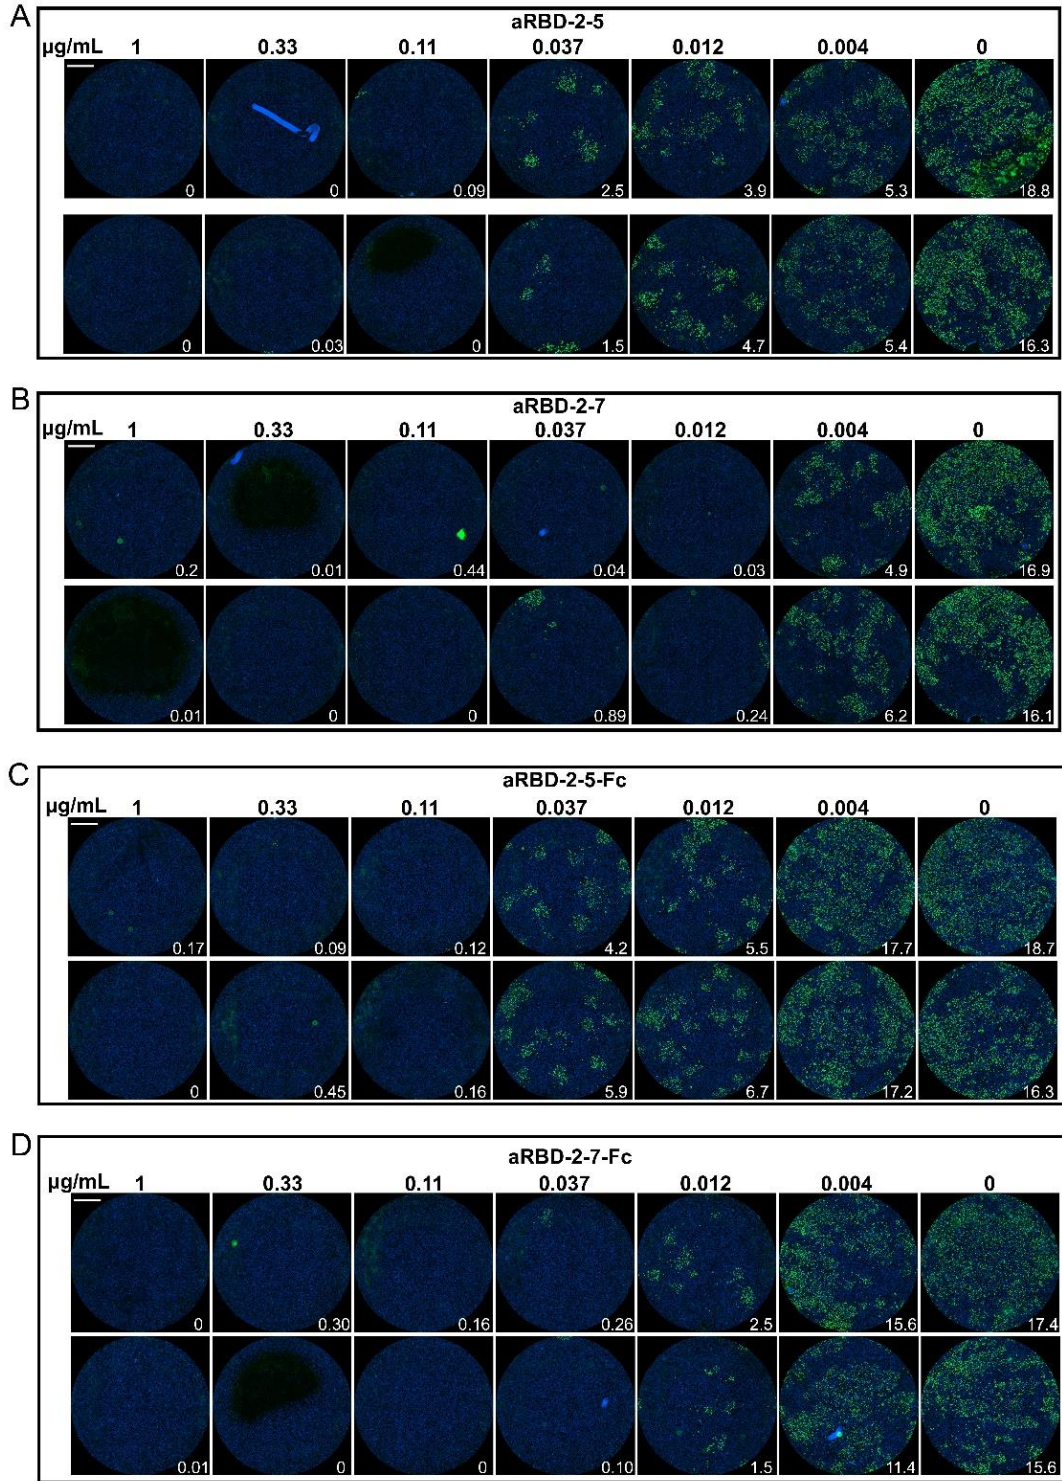

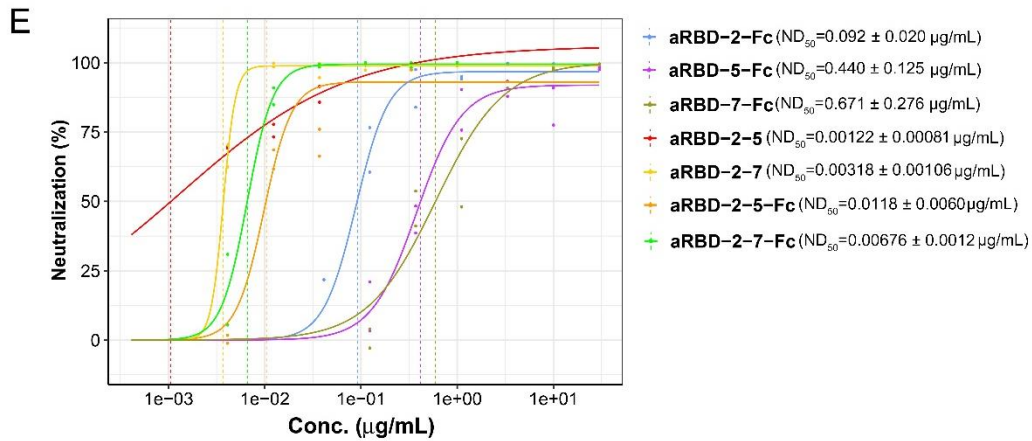

509

510 **Fig. 7. In vitro SARS-CoV-2 neutralization of the hetero-bivalent Nbs and their Fc fusions.** The  
511 serially diluted aRBD-2-5 (A), aRBD-2-7 (B), aRBD-2-5-Fc (C) and aRBD-2-7-Fc (D) was incubated  
512 with ~200 PFU of SARS-CoV-2. The mixture were then added to Vero E6 cells in 96-well plates. After  
513 2 days of infection, the infected virus were stained green with a monoclonal antibody against SARS-  
514 CoV-2 NP and an Alexa Fluor 488-conjugated goat anti-mouse secondary antibody. The nucleus was  
515 stained blue with Hoechst 33342. Each experiment was performed in duplicate. Numbers in the low right  
516 corner of each grid were the percentage of cells infected by the virus. (E)  $\text{ND}_{50}$  of the identified Nbs and  
517 their Fc fusions were calculated by fitting the neutralization from serially diluted antibody with a Log-  
518 logistic model. The data are fitted to the model with the drc package in R to obtain the 95% confidence  
519 intervals.

520

521

522 **Supplementary materials:** Fig.S1 to Fig. S7.

523 **Supplemental Figures**

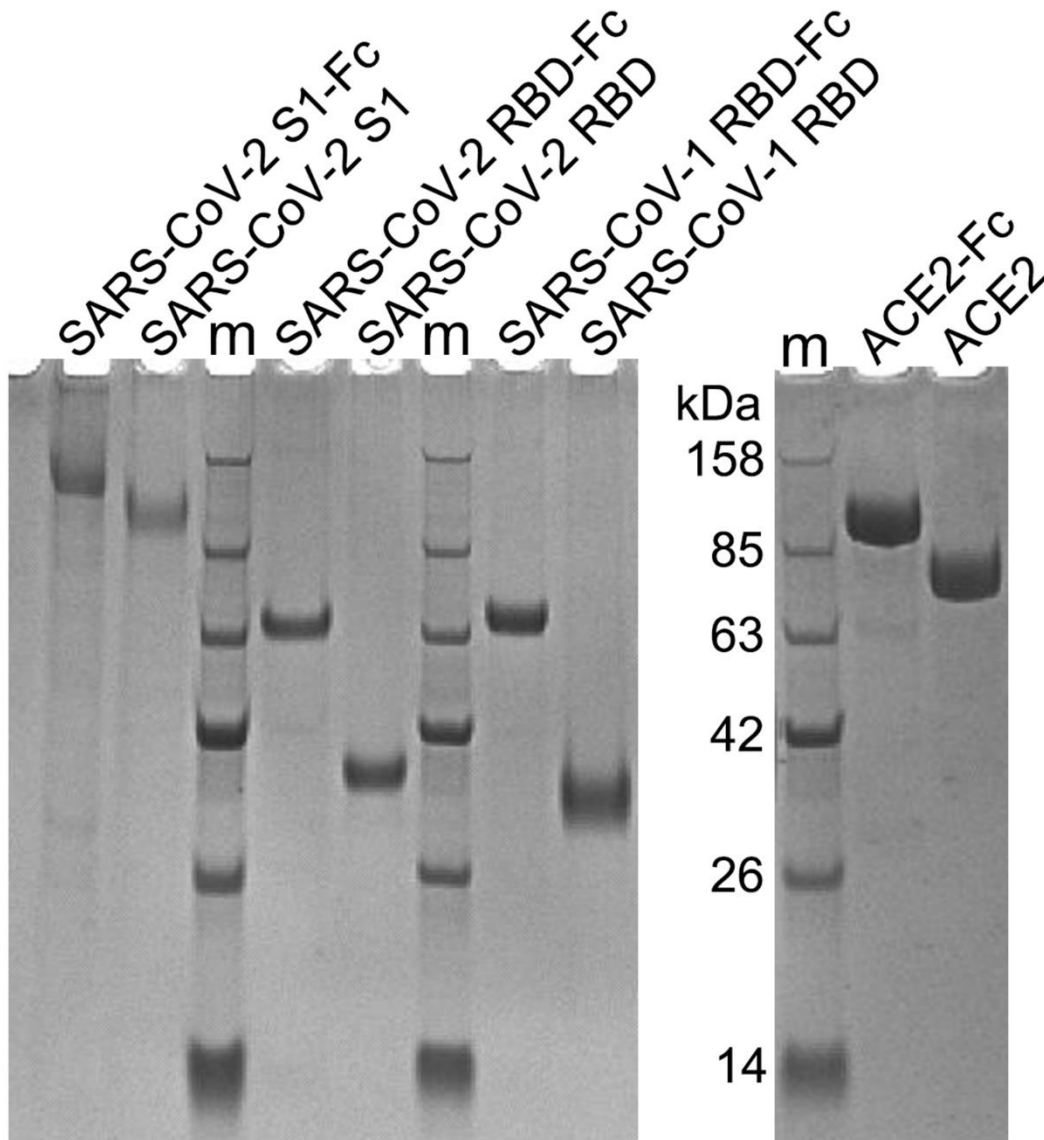

524

525 **Fig. S1. Reduced SDS-PAGE analysis of the purified proteins used in this study.** All the proteins  
526 were fused with a TEV protease cleavage site and human IgG1 Fc and expressed using HEK293F cells,  
527 all the protein-TEV-Fc fusions were purified from culture supernatant with protein A. After digesting  
528 with TEV enzyme, the proteins without TEV-Fc were purified from the flow-through of protein A and  
529 Ni NTA. "m" is marker.

530

531

532

533

534

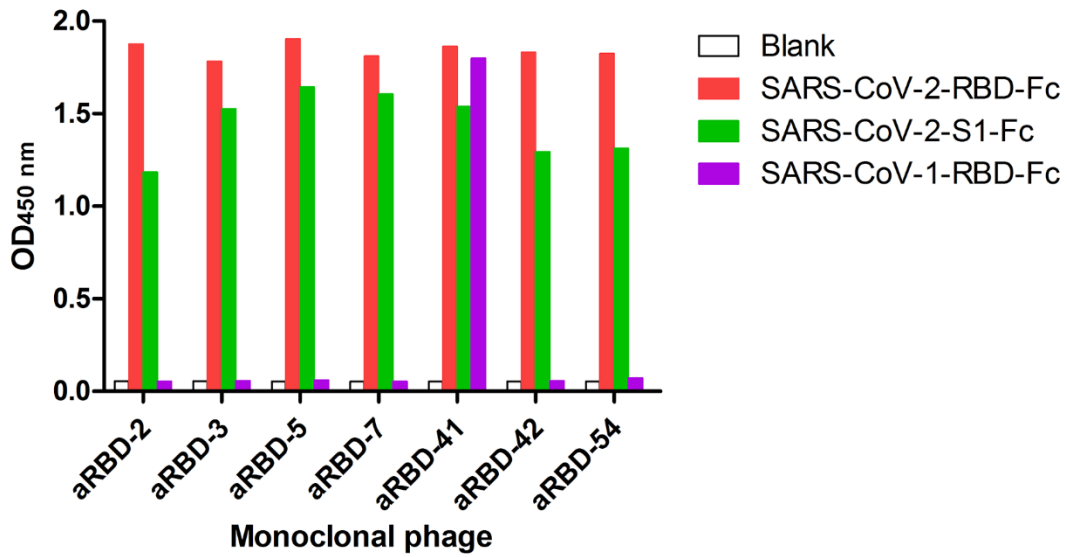

535

536 **Fig. S2. Identification of the binding of the seven positive phage clones to SARS-CoV related**  
537 **antigens using phage ELISA.** All seven phages can bind to the S1 domain of SARS-CoV-2, one (aRBD-  
538 41) of them can also bind to SARS-CoV-1 RBD.

539

540

541

542

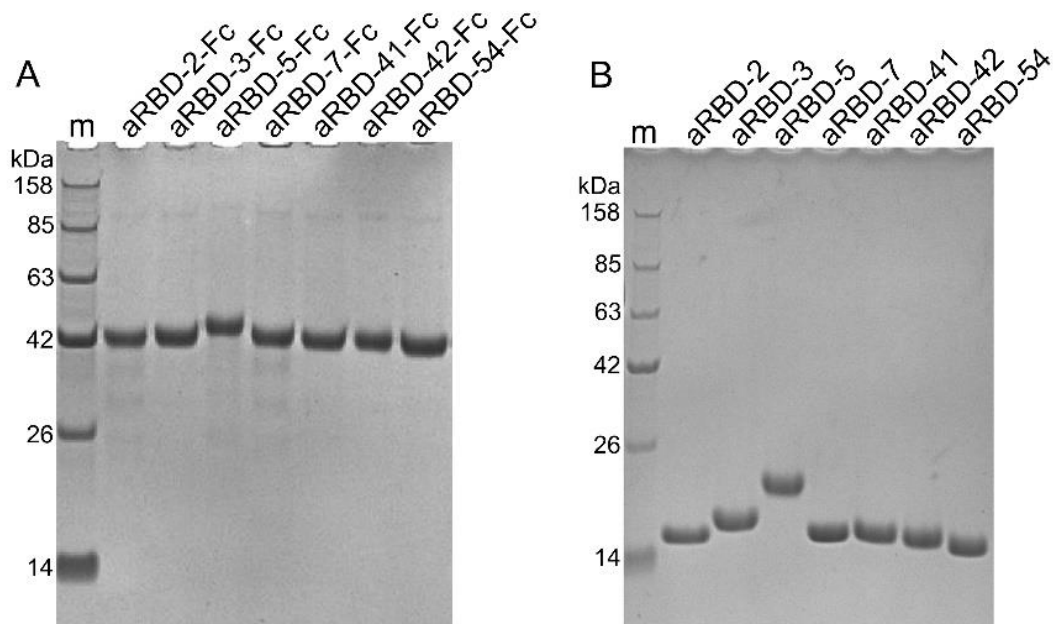

543

544 **Fig. S3. Reduced SDS-PAGE analysis of the purified Nbs and their Fc fusions.** (A) The purified  
545 seven Nb-Fc fusions; (B) The purified seven Nbs. Due to glycosylation, the molecular weight of aRBD-  
546 5 is higher than others.

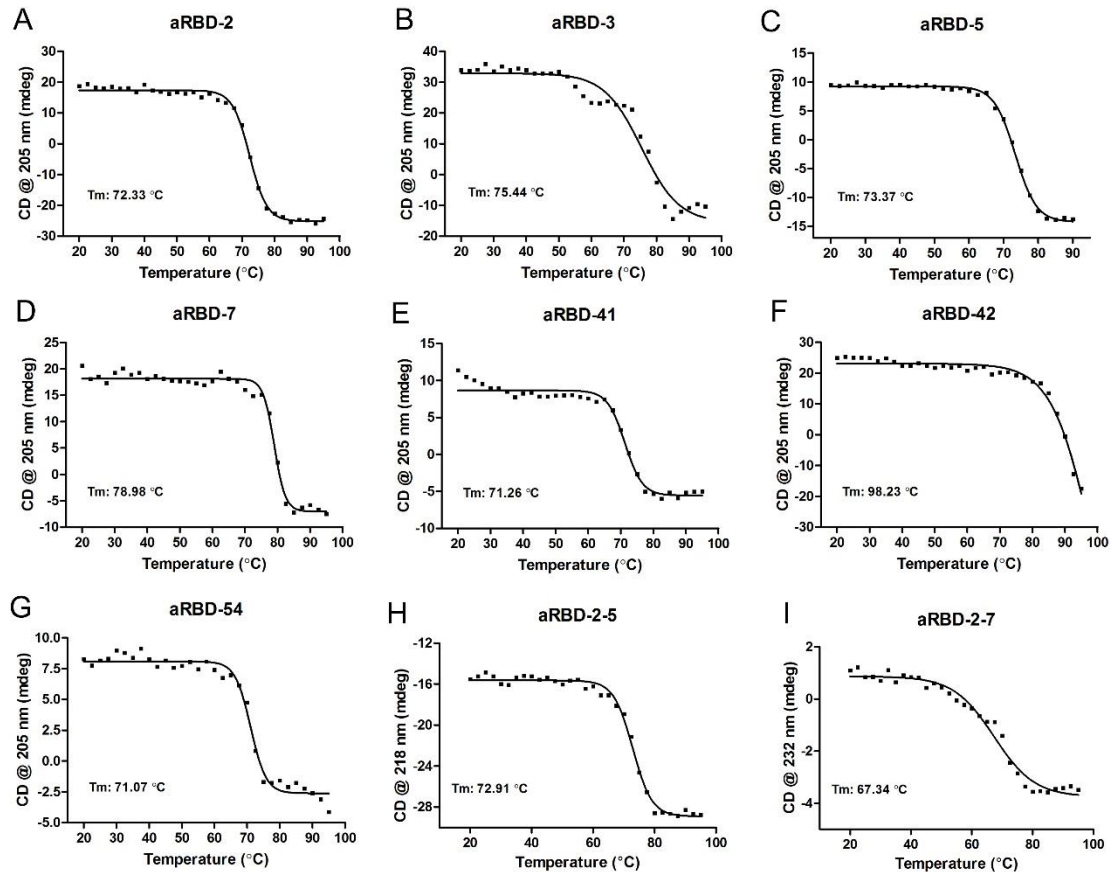

548 **Fig. S4. Thermal denature of Nbs by CD spectrum.** A-I is thermal denature curve of aRBD-2, aRBD-  
549 3, aRBD-5, aRBD-7, aRBD-41, aRBD-42, aRBD-54, aRBD-2-5 and aRBD-2-7, respectively. Each  
550 experiment was repeated twice, the results data were fitted by Prism software.

551

552

553

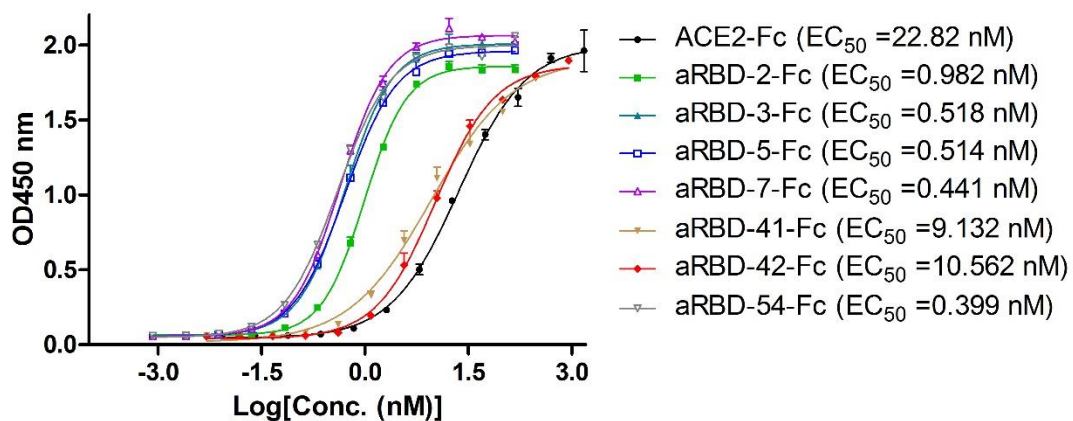

555 **Fig. S5. ELISA results for characterization of binding between identified Nbs and RBD variant**  
556 **contains N501Y mutation.** EC<sub>50</sub> was calculated by fitting the OD<sub>450</sub> from serially diluted antibody with  
557 a sigmoidal dose-response curve. Error bars indicate mean  $\pm$ SD from two independent experiments.

558

559

560

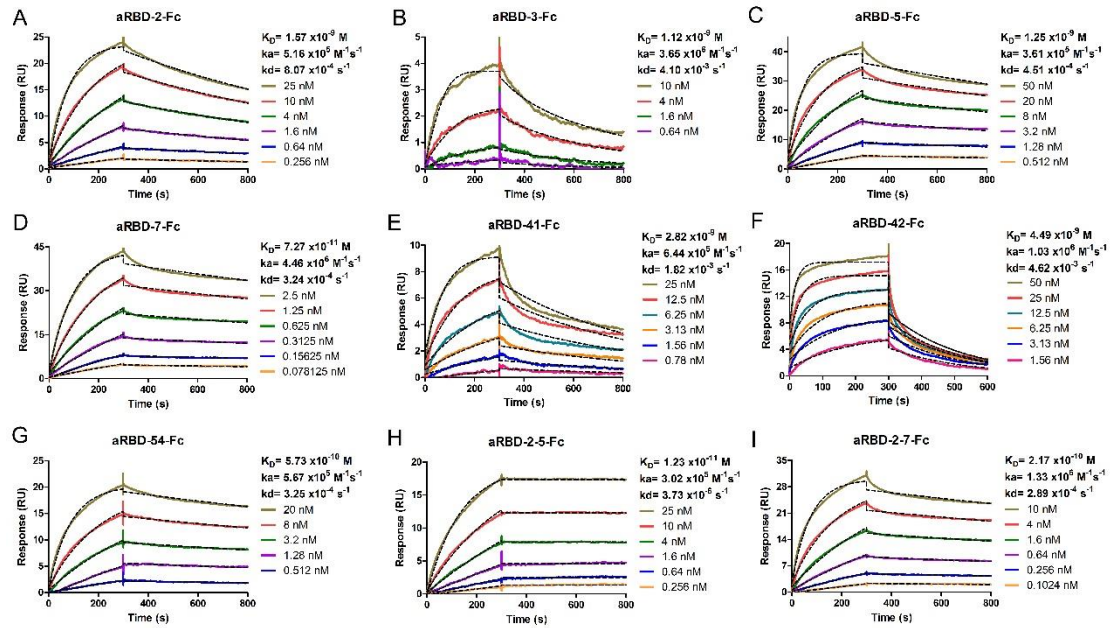

561

562 **Fig. S6. RBD-binding activity characterization of isolated Nb-Fc fusions using SPR.** Binding  
563 kinetics of aRBD-2-Fc (A), aRBD-3-Fc (B), aRBD-5-Fc (C), aRBD-7-Fc (D), aRBD-41-Fc (E), aRBD-  
564 42-Fc(F), aRBD-54-Fc (G), aRBD-2-5-Fc (H) and aRBD-2-7-Fc (I) was measured by SPR. The SARS-  
565 CoV-2 RBD was immobilized onto a CM5 sensor chip, Nb-Fc fusions with serially 1:1 dilutions were  
566 injected and monitored by Biacore T200 system. Binding curves are colored lines, and fit of the data to  
567 a 1:1 binding model are black dotted lines.

568



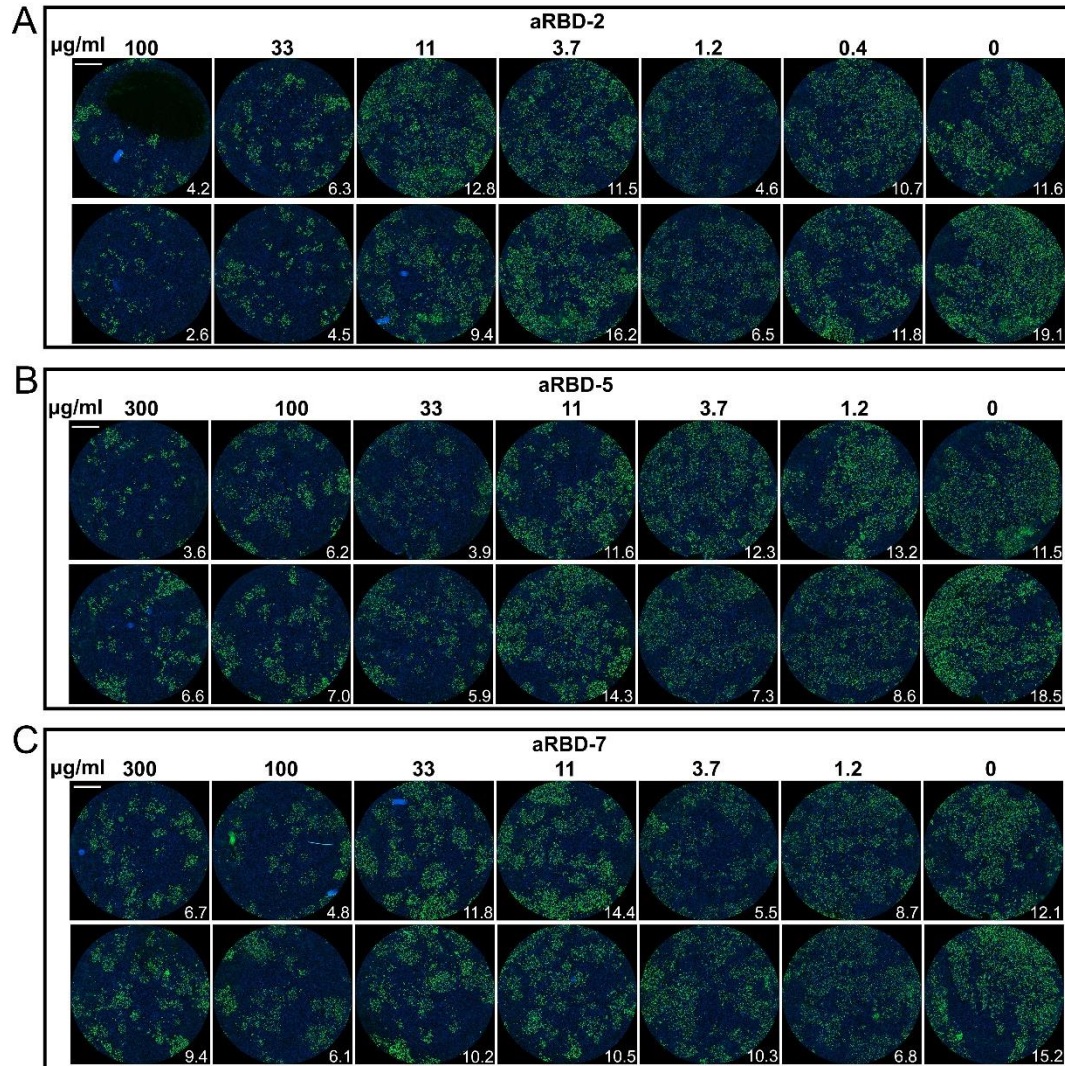

569

570 **Fig. S7. *In vitro* SARS-CoV-2 neutralization of three representative Nb monomers.** The serially  
571 diluted aRBD-2 (A), aRBD-5 (B) and aRBD-7 (B) was incubated with ~200 PFU of SARS-CoV-2. The  
572 mixture were then added to Vero E6 cells in 96-well plates. After 2 days of infection, the cells were  
573 stained with a monoclonal antibody against SARS-CoV-2 NP and an Alexa Fluor 488-conjugated goat  
574 anti-mouse secondary antibody. The nucleus was stained blue with Hoechst 33342. The experiment was  
575 performed in duplicate. Numbers in the low right corner of each grid were the percentage of cells infected  
576 by the virus.

577

578

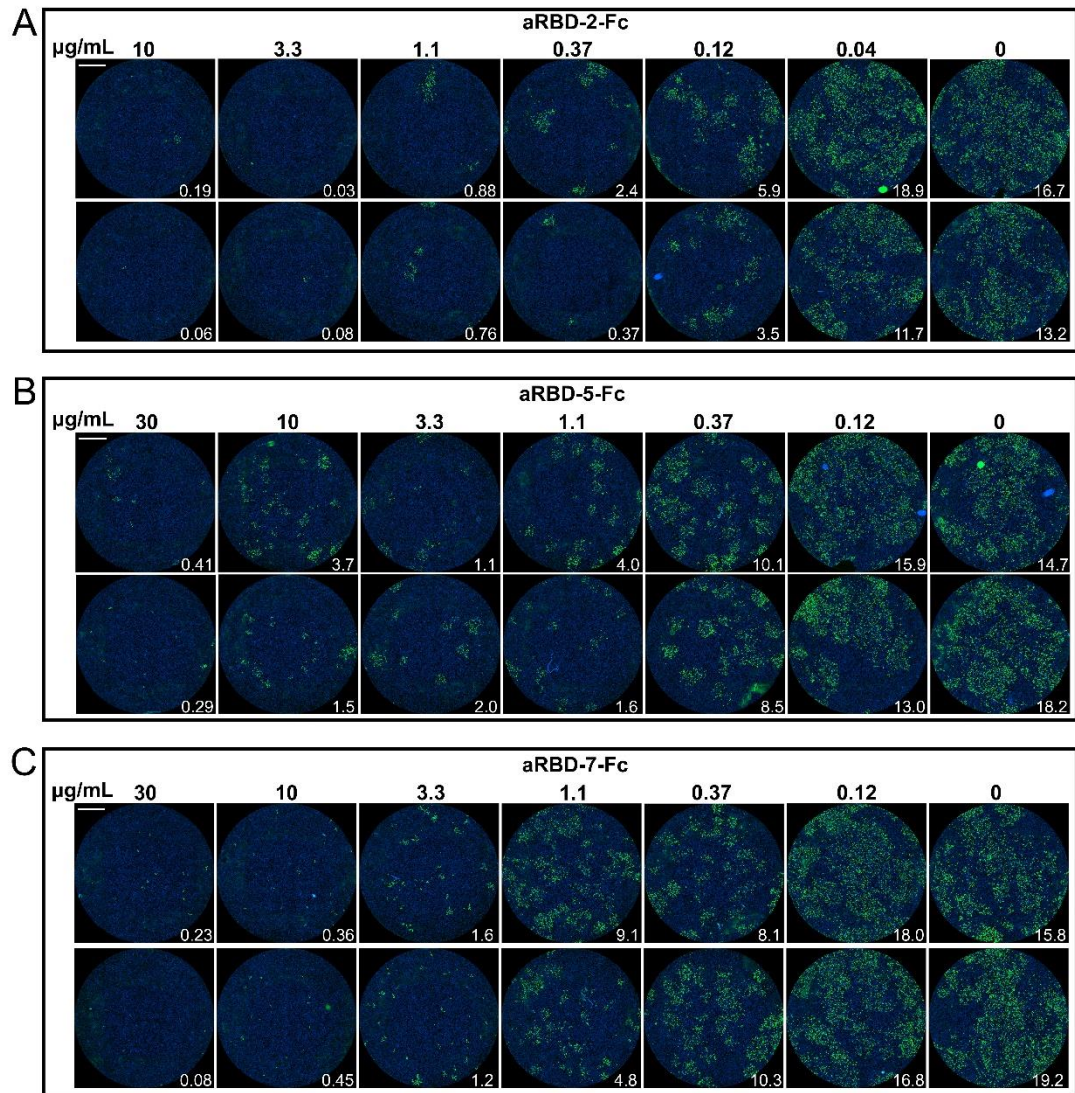

579

580 **Fig. S8. *In vitro* SARS-CoV-2 neutralization of Nb-Fc fusions.** The serially diluted aRD-2-Fc (A),  
581 aRD-5-Fc (B) and aRD-7-Fc (C) was incubated with ~200 PFU of SARS-CoV-2. The mixture were  
582 then added to Vero E6 cells in 96-well plates. After 2 days of infection, the cells were stained with a  
583 monoclonal antibody against SARS-CoV-2 NP and an Alexa Fluor 488-conjugated goat anti-mouse  
584 secondary antibody. The nucleus was stained blue with Hoechst 33342. The experiment was performed  
585 in duplicate. Numbers in the low right corner of each grid were the percentage of cells infected by the  
586 virus.

587
